# Supplementary material for: Modelling the effects of climate and landcover change on the hydrologic regime of a snowmelt-dominated montane catchment
Source: Copernicus journal article supplement (doi:10.5194/hess-2023-248), 2023-11-02
Supplement: Supplementary file 1 [file hess-2023-248-supplement.pdf]

## Supplementary tables

**Table S1. Spatial data used to discretize and parameterize the HRUs implemented in Raven.**

| Variable                                                         | Purpose                                                                                                                                   | Source                                                                        |
|------------------------------------------------------------------|-------------------------------------------------------------------------------------------------------------------------------------------|-------------------------------------------------------------------------------|
| Elevation                                                        | Delineating catchment boundaries; parameterizing HRUs for elevation, slope aspect, slope gradient                                         | <sup>1</sup> Canadian Digital Elevation Model 3.0                             |
| Leading tree species, canopy closure, stand height, harvest year | Discretizing HRUs; informing parameterization of HRUs for leaf area index, canopy interception, canopy closure, regenerating stand height | <sup>2</sup> 2012 VRI - Forest Vegetation Composite Polygons and Rank 1 Layer |
| Wildfire year                                                    |                                                                                                                                           | <sup>3</sup> Fire Incident Locations – Historical                             |
| BEC variant                                                      | Discretizing HRUs; informing parameterization of HRUs for leaf area index, canopy interception, canopy closure, clumpiness                | <sup>4</sup> Biogeoclimatic Ecosystem Classification Map                      |
| Soil                                                             | Discretizing HRUs; informing parameterization of HRUs for soil texture, porosity, depth, permeability, runoff rate                        | <sup>5</sup> Soil Survey Spatial View                                         |

1. <https://open.canada.ca/data/en/dataset/7f245e4d-76c2-4caa-951a-45d1d2051333>; accessed May 2023
2. <https://catalogue.data.gov.bc.ca/dataset/vri-historical-vegetation-resource-inventory-2002-2020->; accessed May 2023
3. <https://open.canada.ca/data/en/dataset/e2dad60-292f-4d98-b42b-56ca9e4fe694>; accessed May 2023
4. <https://open.canada.ca/data/en/dataset/f358a53b-ffde-4830-a325-a5a03ff672c3>; accessed May 2023
5. <https://catalogue.data.gov.bc.ca/dataset/soil-survey-spatial-view>; accessed May 2023

**Table S2. Summary of manual snowpack survey stations. The 2019 records were utilized for constraining model parameters, whereas the older records were utilized for calibration and validation.**

| Station                      | Elev. (m) | Slope (deg.) | Aspect (deg.) | Leading species | Crown clos. (%)    | BEC variant | Record    | Source                |
|------------------------------|-----------|--------------|---------------|-----------------|--------------------|-------------|-----------|-----------------------|
| UP1                          | 1629      | 4.1          | 146           | Clearing        | NA                 | ESSFdc1     | 1995-2009 |                       |
| UP2                          | 1660      | 4.6          | 209           | Mature Pl       | <sup>1</sup> 83    | ESSFdc1     | 1995-2015 |                       |
| UP3                          | 1644      | 4.6          | 240           | Clearing        | NA                 | ESSFdc1     | 1995-1997 |                       |
| UP4                          | 1658      | 5.6          | 289           | Mature S/F      | <sup>2</sup> 70    | ESSFdc1     | 1995-1997 |                       |
| UP9                          | 1884      | 10.8         | 232           | 3-5 m regen     | NA                 | ESSFdc1     | 2000-2015 | Winkler et al., 2017  |
| UP10                         | 1922      | 13.2         | 231           | Mature Pl       | <sup>1</sup> 83    | ESSFdc1     | 2000-2015 |                       |
| UP11                         | 1713      | 6.6          | 197           | 5-7 m regen     | NA                 | ESSFdc1     | 2003-2009 |                       |
| UP12                         | 1723      | 8.9          | 222           | Mature Pl       | <sup>2</sup> 65    | ESSFdc1     | 2003-2009 |                       |
| UP13                         | 1675      | 4.4          | 163           | 3-5 m regen     | NA                 | ESSFdc1     | 2005-2015 |                       |
| 2F08<br>(Greyback Reservoir) | 1546      | 5.7          | 217           | Mature S/F      | <sup>3</sup> 50-60 | MSdm1       | 1953-2015 | <sup>4</sup> BC Gov't |
| PPP1                         | 801       | 15.7         | 356           | Clearing        | NA                 | PPxh1       | 2019      |                       |
| PPP2                         | 710       | 9.6          | 315           | Mature Py/Fd    | <sup>3</sup> 40-50 | PPxh1       | 2019      |                       |
| PIDF1                        | 1283      | 5.1          | 207           | Clearing        | NA                 | IDFdm1      | 2019      |                       |
| PIDF2                        | 1297      | 19.7         | 153           | Mature Fd       | <sup>3</sup> 70-80 | IDFdm1      | 2019      |                       |
| PIDF3                        | 1221      | 21.7         | 319           | Mature Fd       | <sup>3</sup> 70-80 | IDFdm1      | 2019      | Smith, 2022           |
| PIDF4                        | 1258      | 18.4         | 327           | Clearing        | NA                 | IDFdm1      | 2019      |                       |
| PMS1                         | 1520      | 11.5         | 101           | Mature Pl       | <sup>3</sup> 75-80 | MSdm1       | 2019      |                       |
| PMS2                         | 1492      | 15.0         | 117           | Clearing        | NA                 | MSdm1       | 2019      |                       |
| PESSF1                       | 1810      | 14.7         | 99            | Mature S/F      | <sup>3</sup> 55-65 | ESSFdc1     | 2019      |                       |
| PESSF2                       | 1771      | 11.2         | 135           | Clearing        | NA                 | ESSFdc1     | 2019      |                       |

1. Measured using hemispherical photos.

2. Acquired from VRI data (Table S1).

3. Estimated visually in the field.

4. <https://www2.gov.bc.ca/gov/content/environment/air-land-water/water/water-science-data/water-data-tools/snow-survey-data>; accessed May 2023

**Table S3. Performance statistics from the model calibration and validation.**

| Dataset                                                          |                 | Objective function         | Performance |            |
|------------------------------------------------------------------|-----------------|----------------------------|-------------|------------|
|                                                                  |                 |                            | Calibration | Validation |
| Composite value                                                  |                 | <sup>1</sup> Mean          | 0.87        | 0.79       |
| Fit to spring<br>freshet<br>discharge                            | Penticton Creek | <sup>2</sup> NSE           | 0.81        | 0.81       |
|                                                                  | 240 Creek       | NSE                        | 0.78        | 0.74       |
|                                                                  | 241 Creek       | NSE                        | 0.77        | 0.80       |
|                                                                  | Dennis Creek    | NSE                        | 0.78        | 0.52       |
| Fit to spring<br>freshet<br>discharge with<br>15-day<br>smoother | Penticton Creek | NSE                        | 0.87        | 0.87       |
|                                                                  | 240 Creek       | NSE                        | 0.93        | 0.86       |
|                                                                  | 241 Creek       | NSE                        | 0.91        | 0.88       |
|                                                                  | Dennis Creek    | NSE                        | 0.90        | 0.68       |
| Spring freshet<br>bias                                           | Penticton Creek | <sup>3</sup> Absolute bias | 0.97        | 0.96       |
|                                                                  | 240 Creek       | Absolute bias              | 0.98        | 0.91       |
|                                                                  | 241 Creek       | Absolute bias              | 0.93        | 0.94       |
|                                                                  | Dennis Creek    | Absolute bias              | 0.90        | 0.94       |
| Low flow bias                                                    | Penticton Creek | Absolute bias              | 0.87        | 0.35       |
|                                                                  | 240 Creek       | Absolute bias              | 0.79        | 0.72       |
|                                                                  | 241 Creek       | Absolute bias              | 0.79        | 0.71       |
|                                                                  | Dennis Creek    | Absolute bias              | 0.61        | 0.47       |
| Fit to SWE                                                       |                 | NSE                        | 0.95        | 0.93       |
| SWE bias                                                         |                 | Absolute bias              | 0.96        | 0.95       |
| Precipitation bias at Penticton Airport                          |                 | Absolute bias              | 1.00        | 0.97       |

1. Arithmetic mean of all metrics listed
2. Nash-Sutcliffe Efficiency
3. One minus absolute bias (normalized by mean of observed)

**Table S4. Discharge ( $\text{m}^3 \text{s}^{-1}$ ) for 2 and 100 year return periods by event type, landcover condition, and climate condition. Values estimated through the event frequency analyses on output from the long-term simulations (Figure 10).**

| Climate condition | Landcover condition | Annual max discharge |         | Summer min discharge |         | Annual discharge |         |
|-------------------|---------------------|----------------------|---------|----------------------|---------|------------------|---------|
|                   |                     | 2 yr.                | 100 yr. | 2 yr.                | 100 yr. | 2 yr.            | 100 yr. |
| Current           | Forested            | 13.8                 | 22.9    | 0.172                | 0.0817  | 1.34             | 0.620   |
|                   | Small burn          | 14.0                 | 22.9    | 0.176                | 0.0827  | 1.35             | 0.631   |
|                   | Large burn          | 15.8                 | 26.9    | 0.209                | 0.0919  | 1.57             | 0.792   |
|                   | 1976                | 14.3                 | 24.2    | 0.180                | 0.0836  | 1.48             | 0.683   |
|                   | 2012                | 14.3                 | 23.0    | 0.175                | 0.0818  | 1.38             | 0.642   |
| 2050s             | Forested            | 12.1                 | 27.0    | 0.0832               | 0.0564  | 1.19             | 0.576   |
|                   | Small burn          | 12.3                 | 27.0    | 0.0837               | 0.0566  | 1.20             | 0.583   |
|                   | Large burn          | 15.2                 | 31.1    | 0.0915               | 0.0594  | 1.39             | 0.718   |
|                   | 1976                | 13.3                 | 29.5    | 0.0860               | 0.0579  | 1.31             | 0.641   |
|                   | 2012                | 12.9                 | 28.1    | 0.0842               | 0.0565  | 1.23             | 0.594   |
| 2080s             | Forested            | 10.1                 | 27.9    | 0.0610               | 0.0415  | 1.33             | 0.747   |
|                   | Small burn          | 10.1                 | 28.1    | 0.0612               | 0.0417  | 1.34             | 0.754   |
|                   | Large burn          | 12.5                 | 31.0    | 0.0660               | 0.0442  | 1.52             | 0.898   |
|                   | 1976                | 11.6                 | 30.5    | 0.0627               | 0.0425  | 1.46             | 0.826   |
|                   | 2012                | 10.6                 | 28.9    | 0.0615               | 0.0417  | 1.36             | 0.771   |

## Supplementary figures

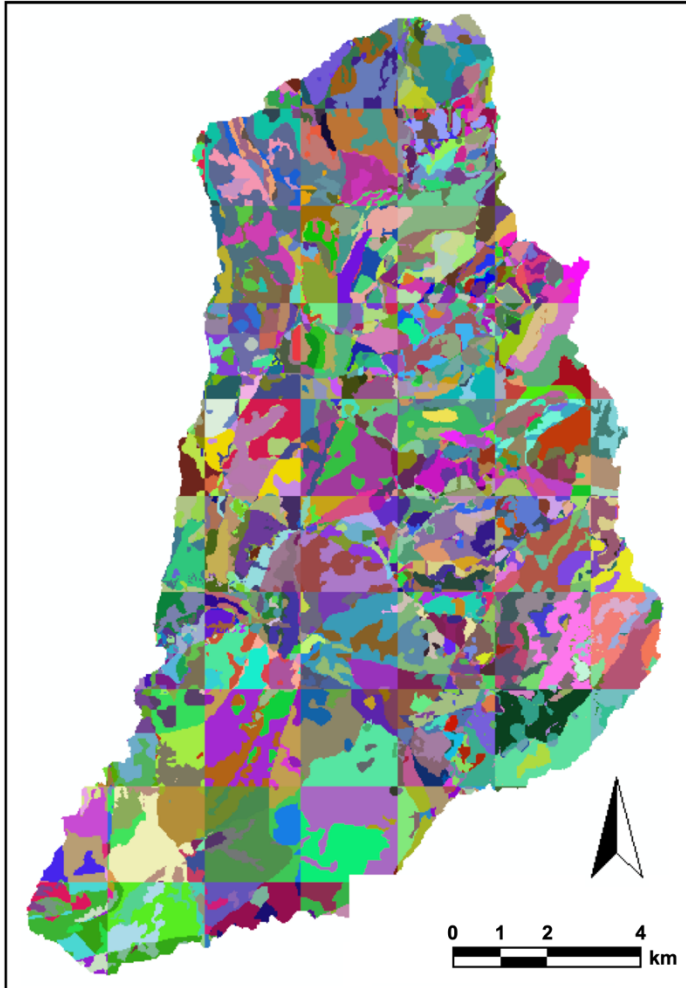

Figure S1. Discretization of the study catchment into 1,315 unique HRUs.

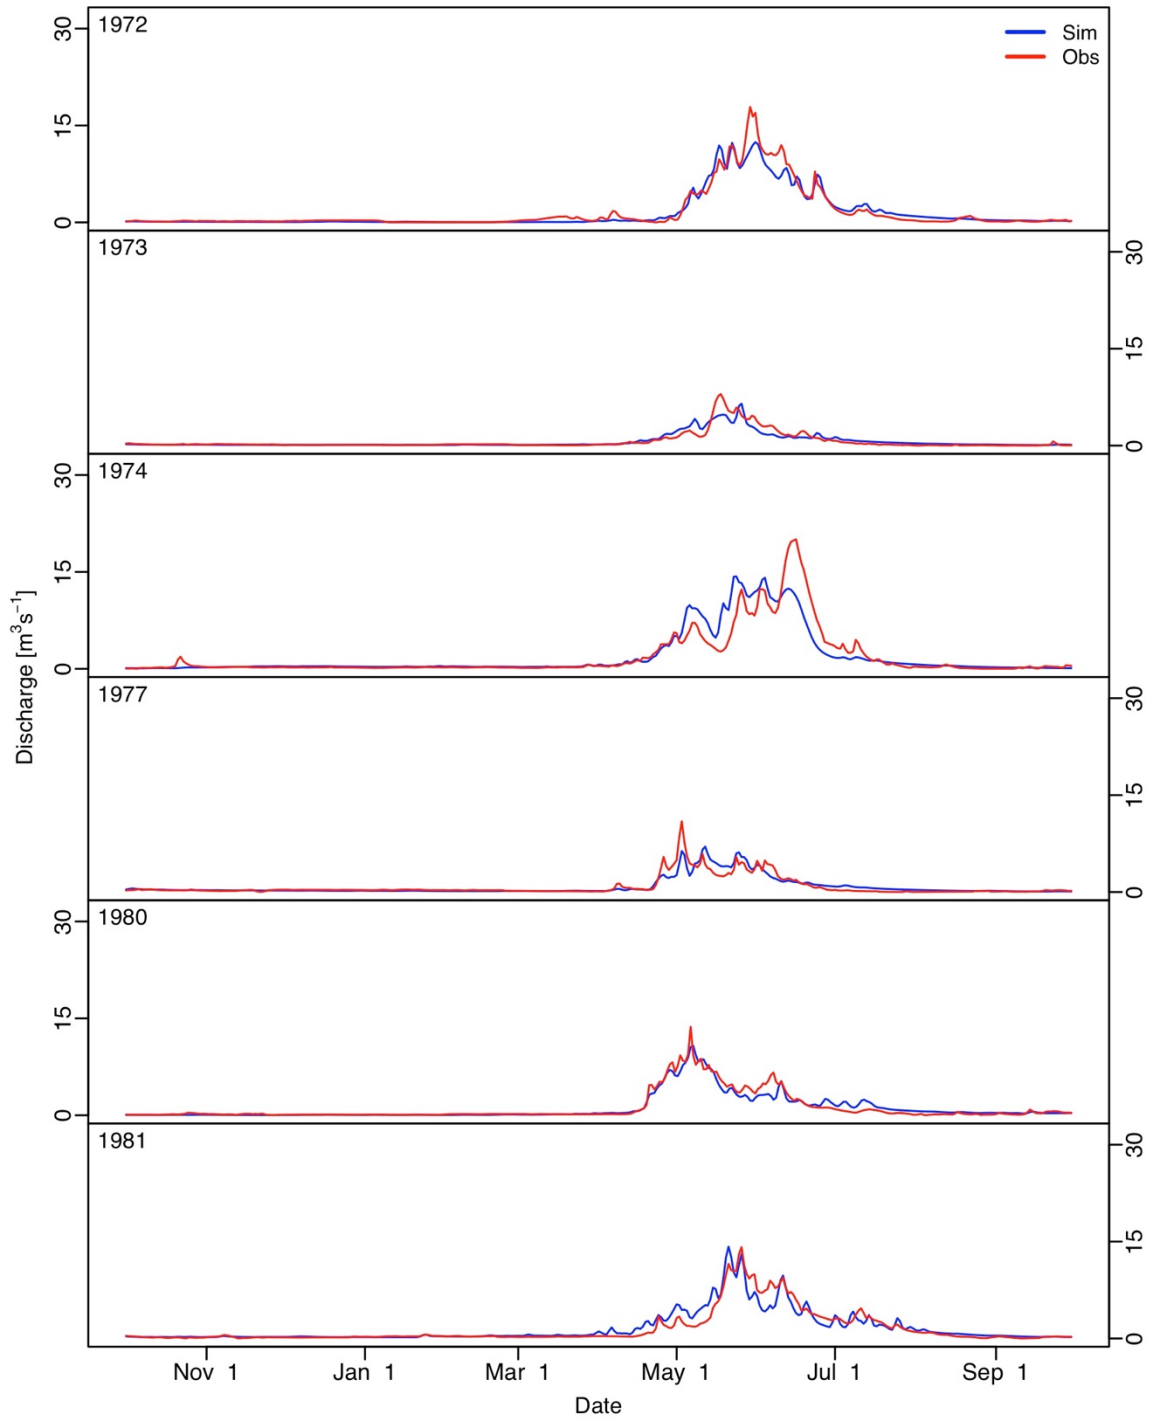

**Figure S2.1. Penticton Creek discharge calibration plot.**

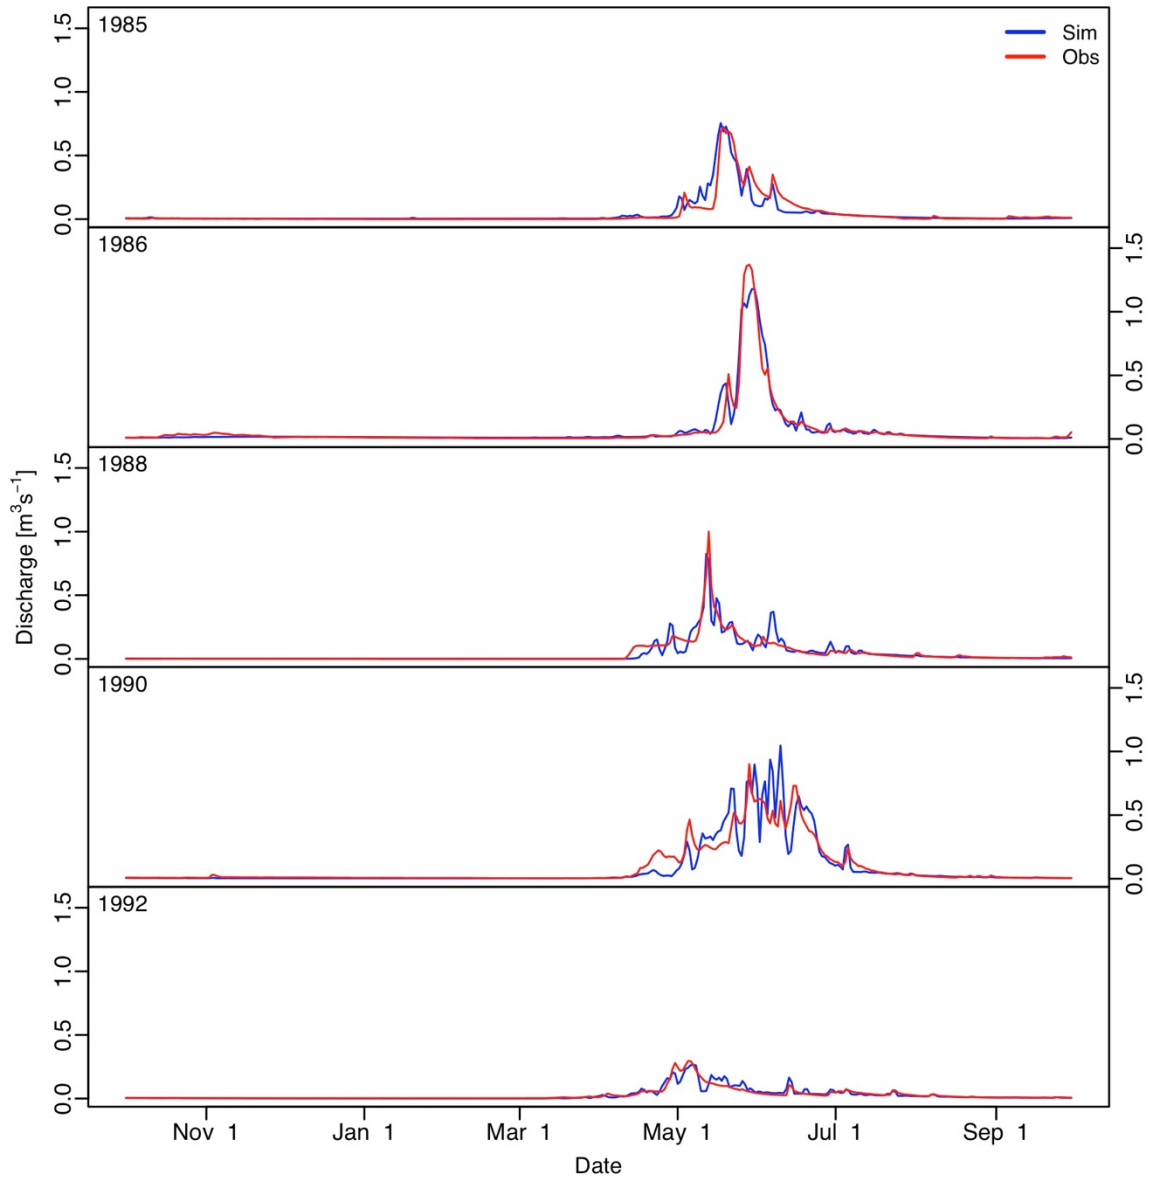

Figure S2.2. 240 Creek discharge calibration plot.

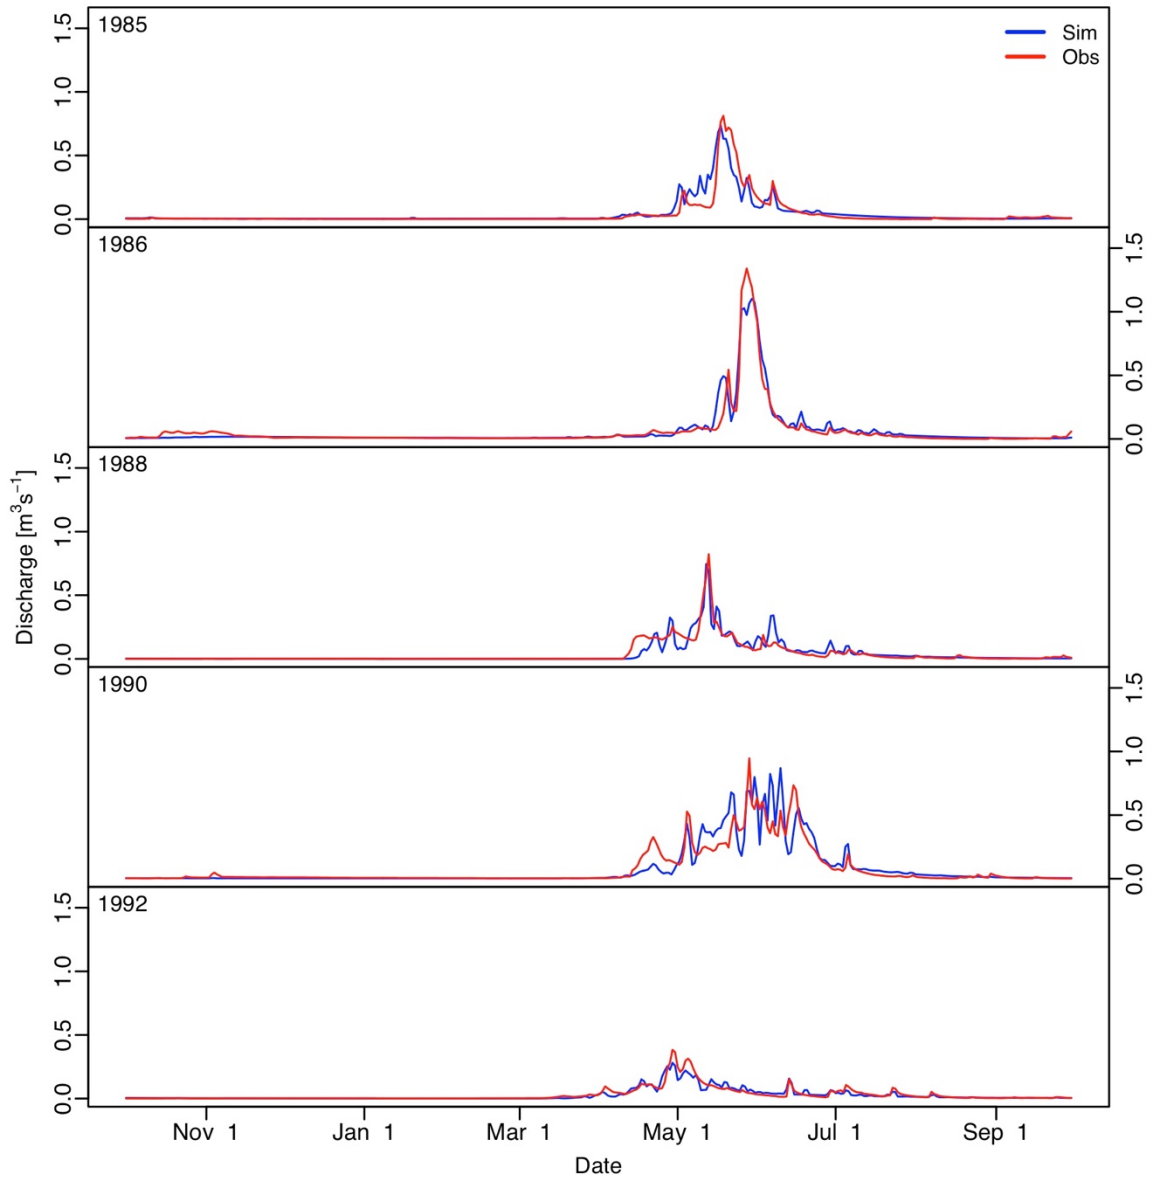

Figure S2.3. 241 Creek discharge calibration plot.



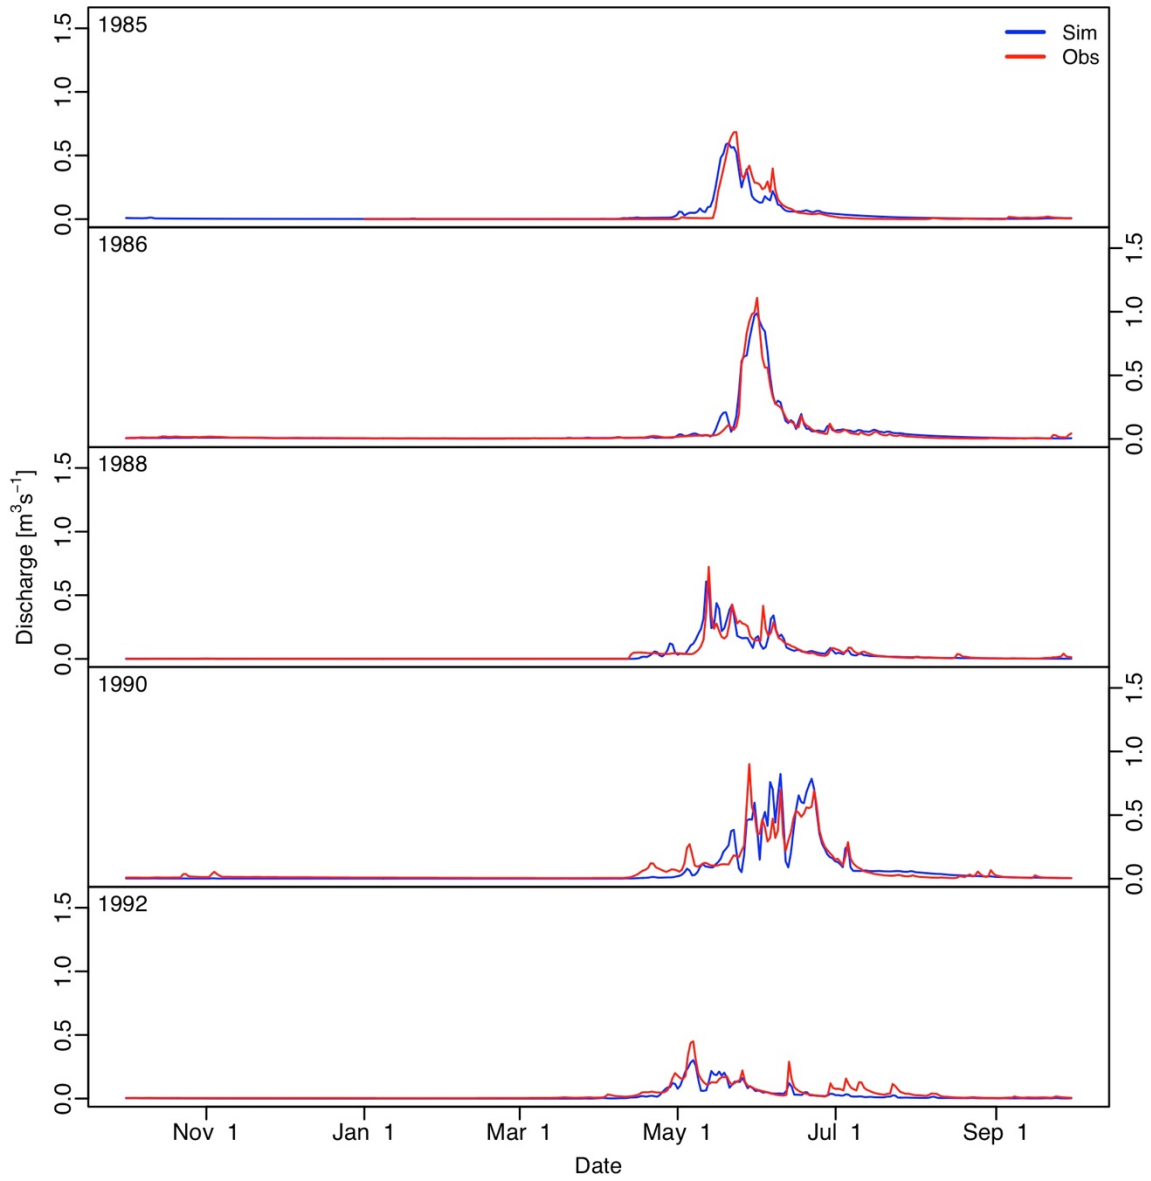

**Figure S2.4. Dennis Creek discharge calibration plot.**

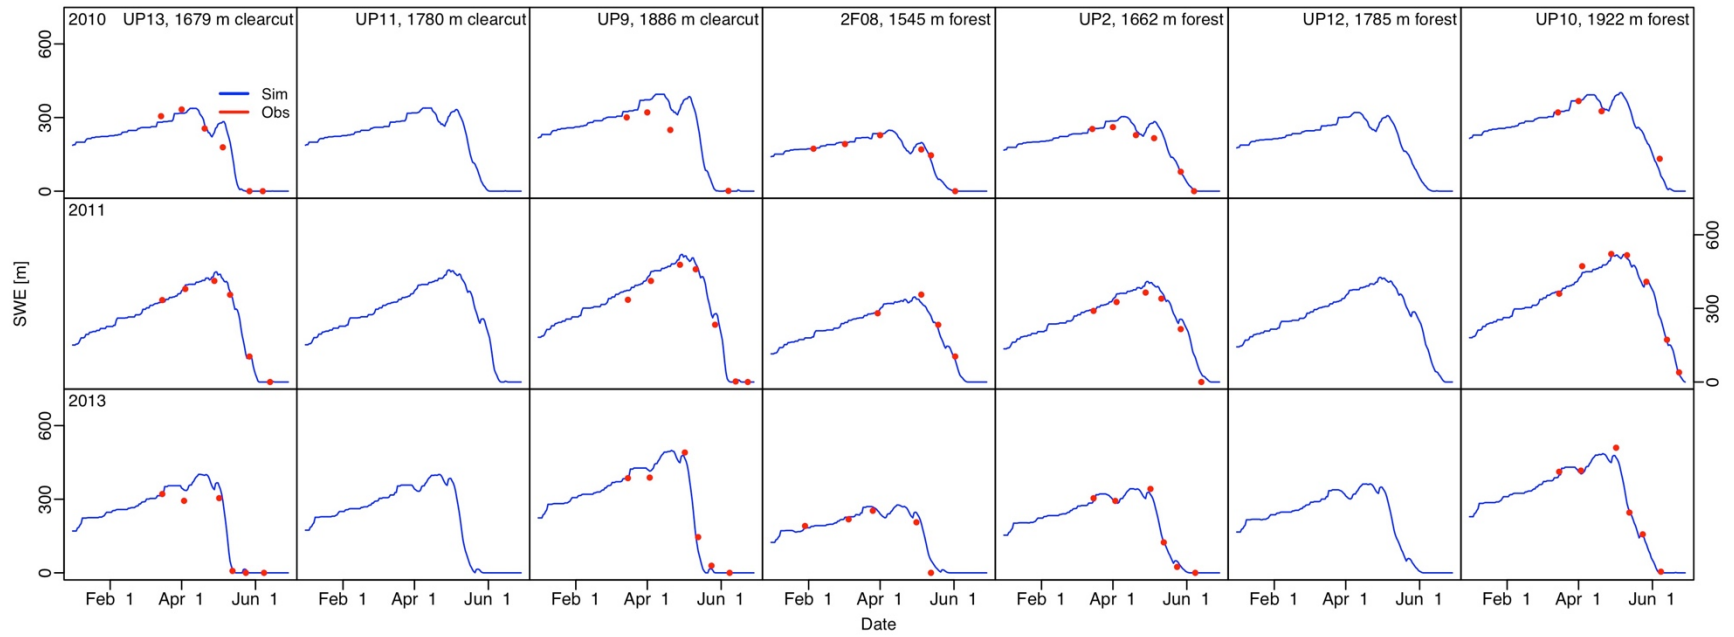

**Figure S2.5. Snowpack calibration plot.**

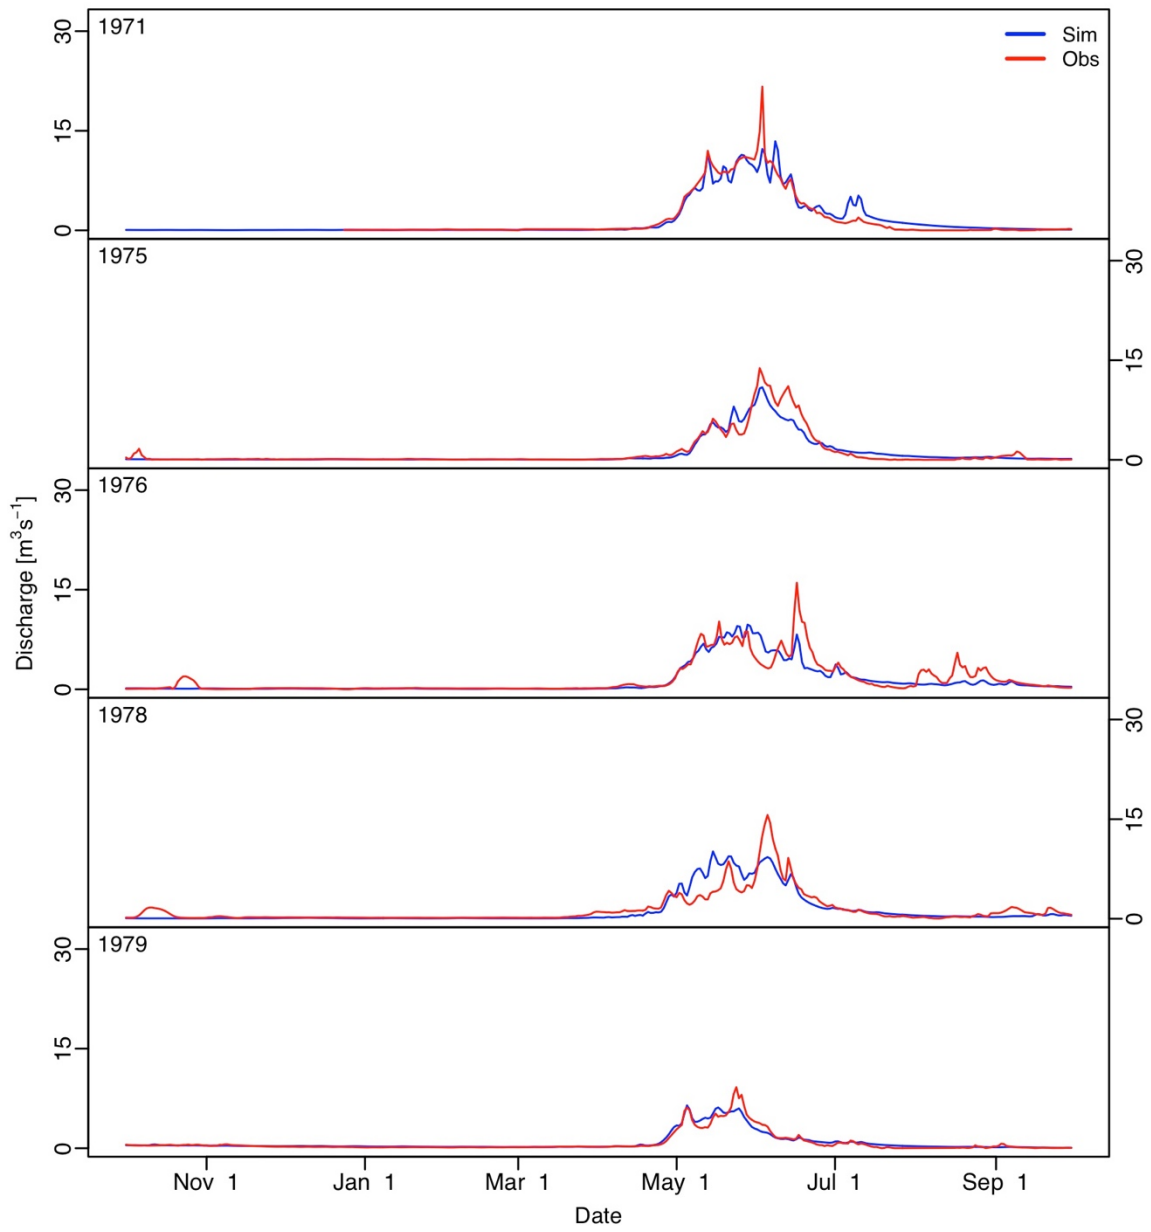

Figure S3.1. Penticton Creek discharge validation plot.

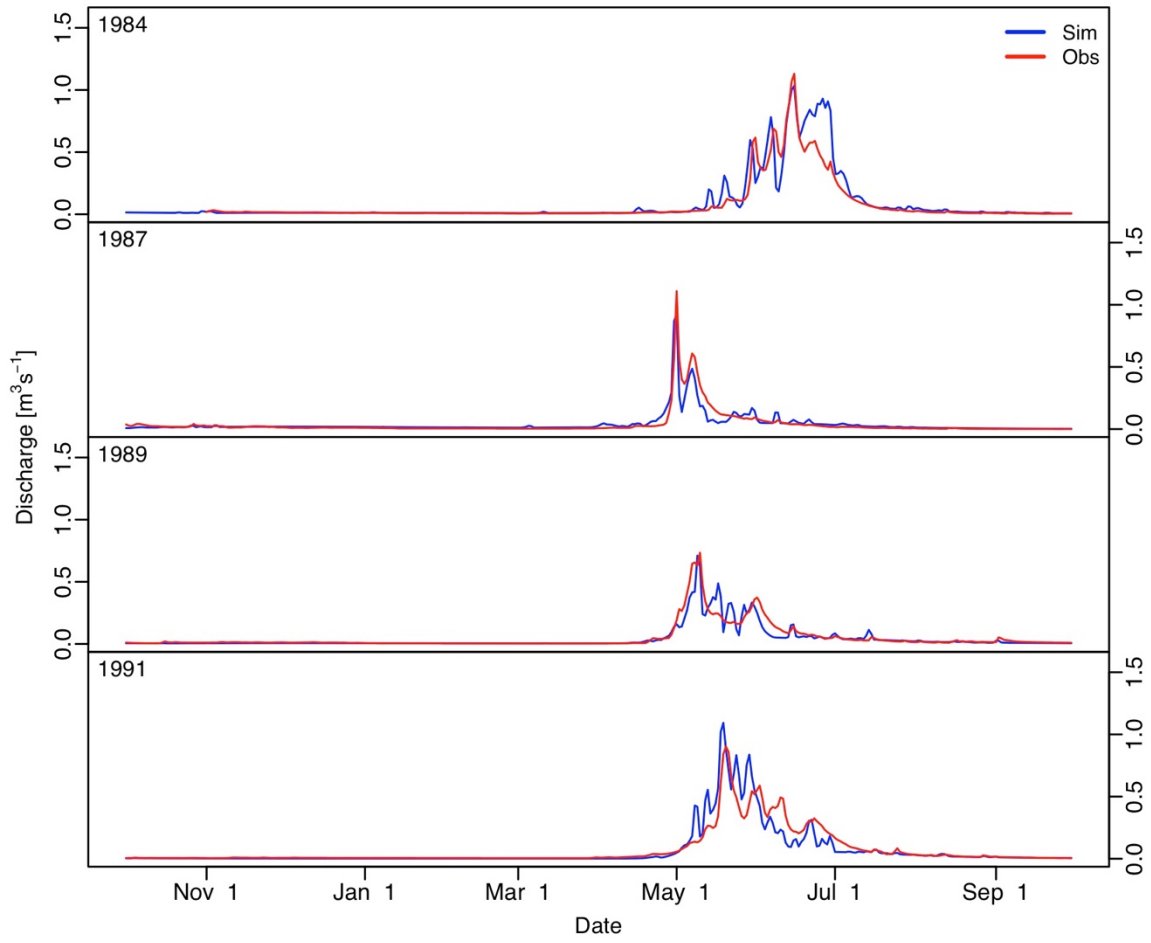

Figure S3.2. 240 Creek discharge validation plot.

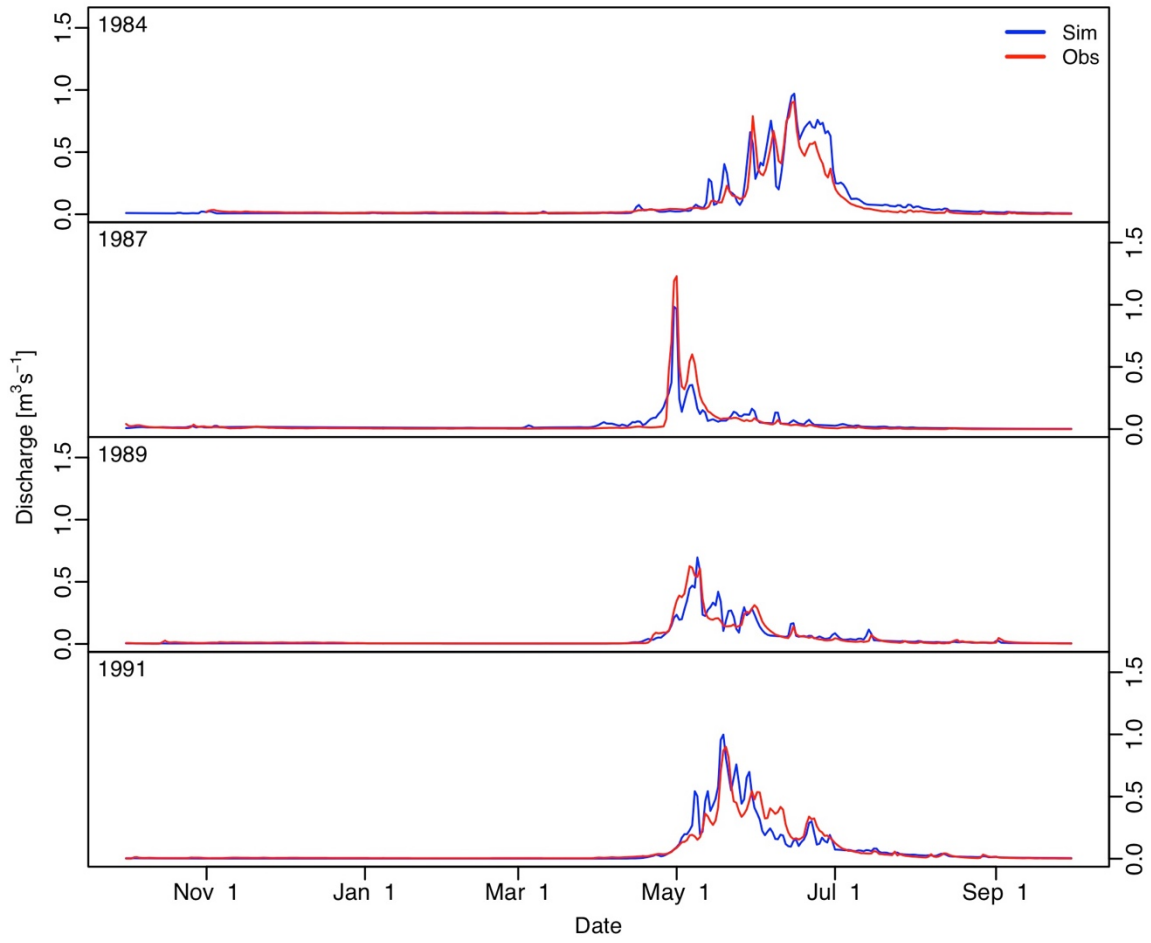

Figure S3.3. 241 Creek discharge validation plot.

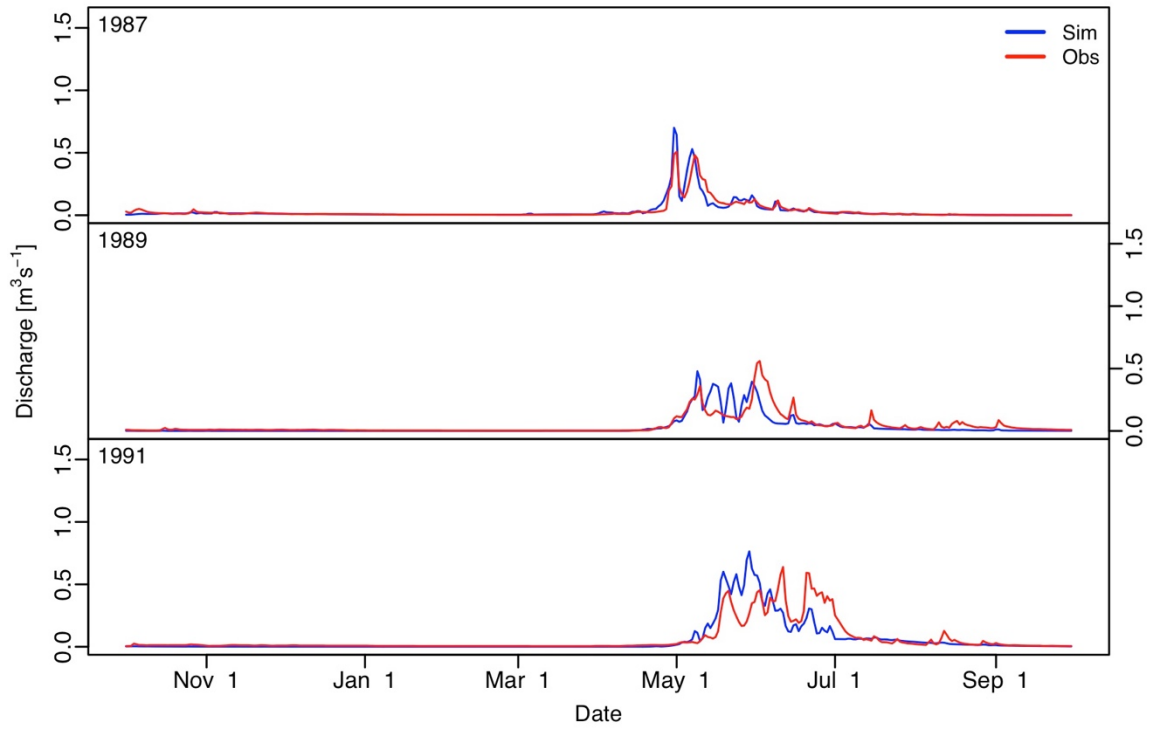

Figure S3.4. Dennis Creek discharge validation plot.

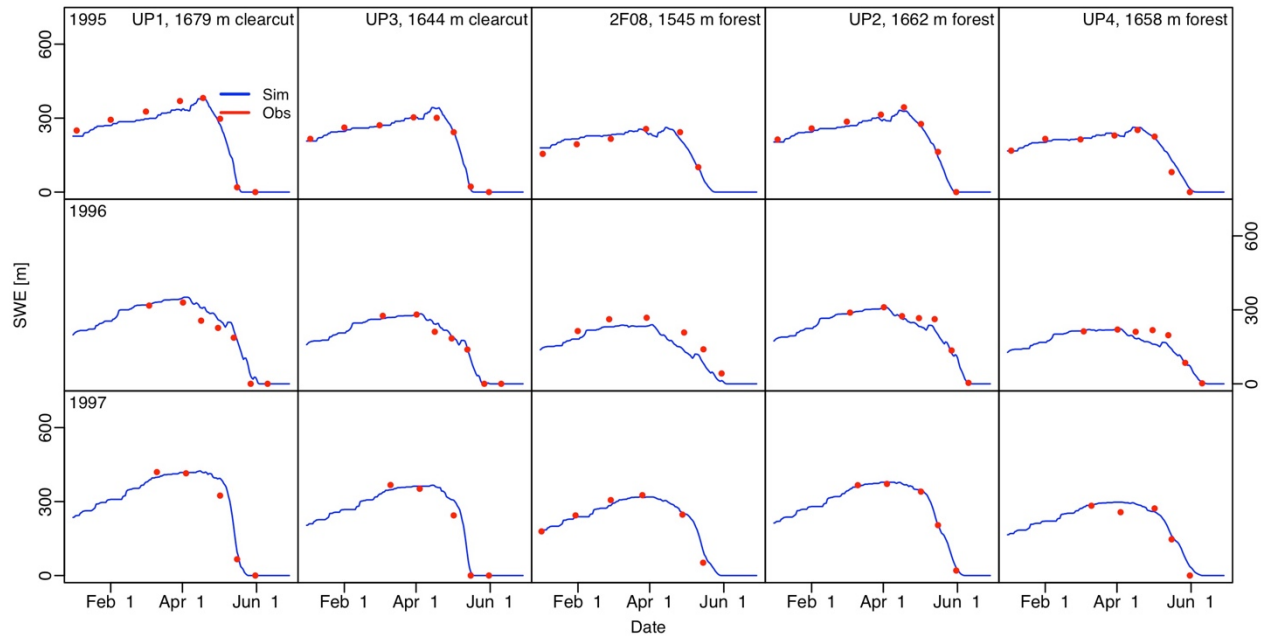

Figure S3.5. Snowpack validation plot.

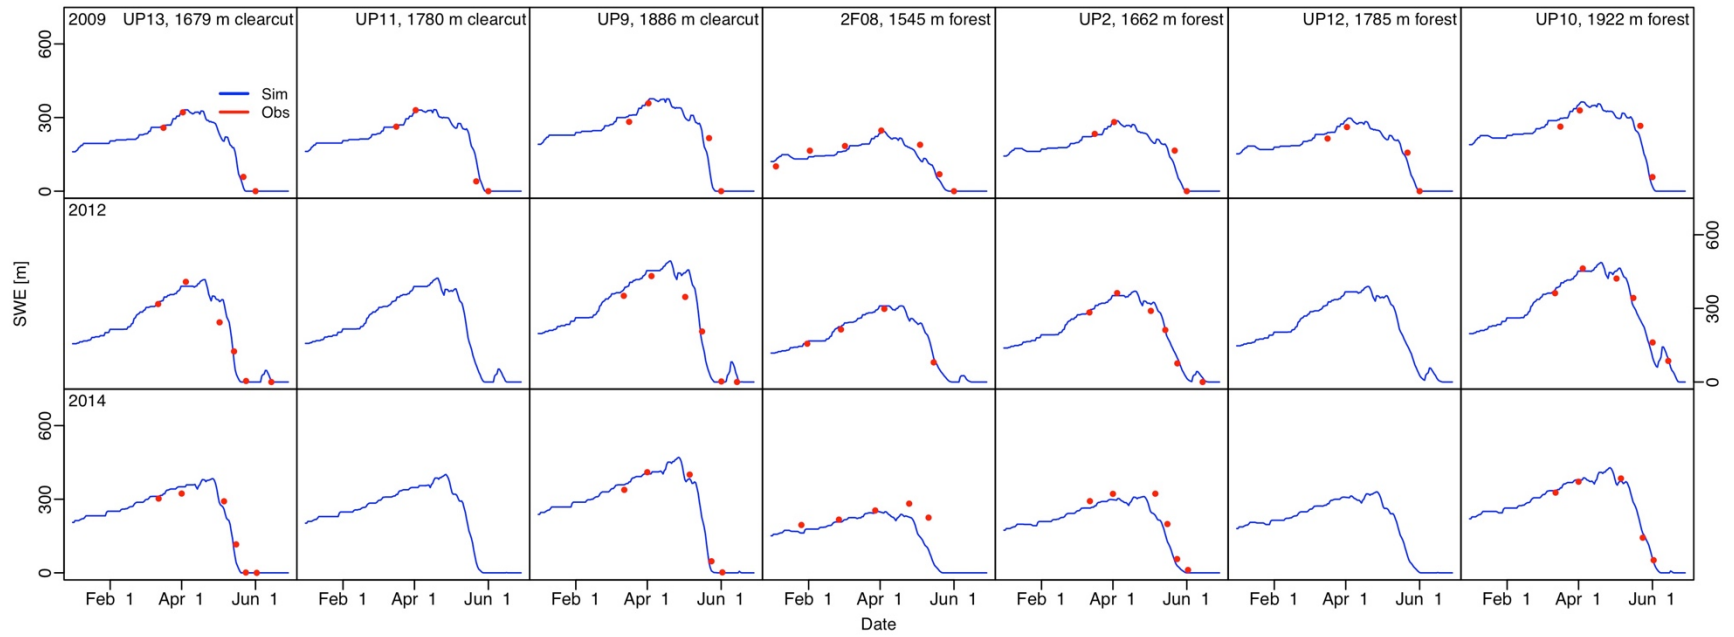

Figure S3.5. Continued.



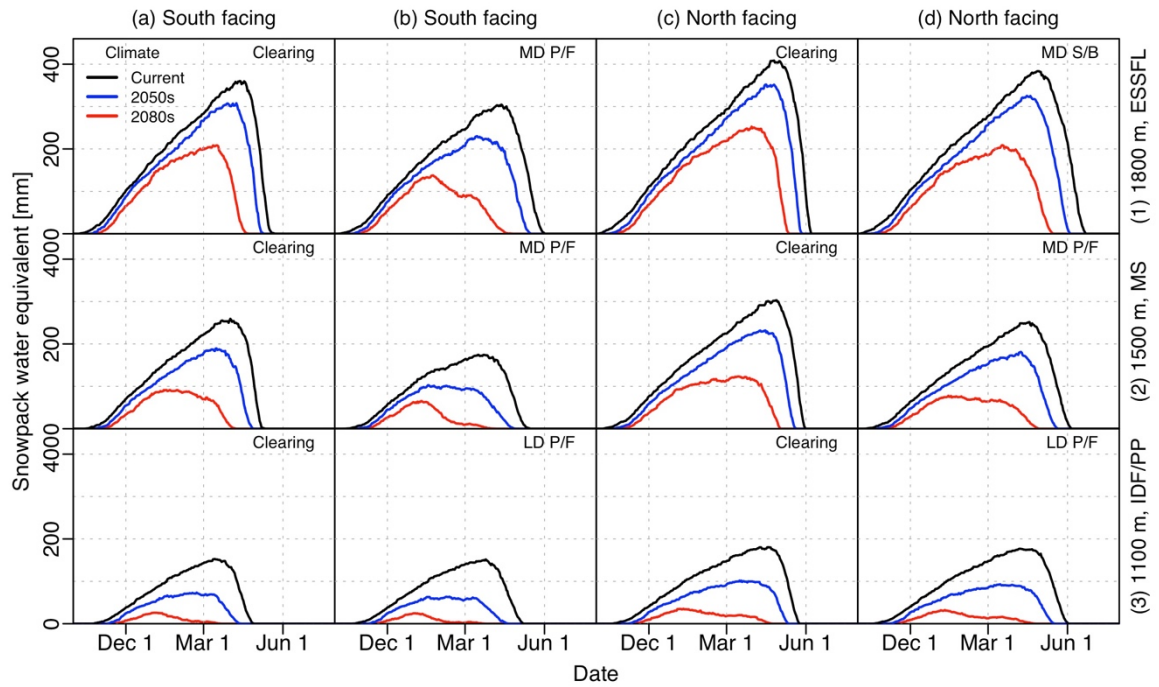

**Figure S4. Median of daily SWE for north and south facing clearings and selected forest types at three elevations (output from site scale snowpack sensitivity analysis). The most common stand type is represented for each slope aspect and elevation. Refer to Sections 2.1 and 2.3.2 for vegetation codes.**
